1                   Avoiding ascertainment bias in  
2                   the maximum likelihood inference of  
3                   phylogenies based on truncated data

4                   Asif Tamuri<sup>1</sup> and Nick Goldman<sup>†,1</sup>

5                   <sup>1</sup>European Molecular Biology Laboratory, European Bioinformatics Institute  
6                   (EMBL-EBI), Wellcome Genome Campus, Hinxton CB10 1SD, UK

7                   This version: SNP\_203.tex, compiled at 14:58 on 8 September 2017

8                   <sup>†</sup>Corresponding author: [goldman@ebi.ac.uk](mailto:goldman@ebi.ac.uk)

## 1 **Abstract**

2 Some phylogenetic datasets omit data matrix positions at which all taxa share the same state.  
3 For sequence data this may be because of a focus on single nucleotide polymorphisms (SNPs)  
4 or the use of a technique such as restriction site-associated DNA sequencing (RADseq) that  
5 concentrates attention onto regions of differences. With morphological data, it is common to  
6 omit states that show no variation across the data studied. It is already known that failing to  
7 correct for the ascertainment bias of omitting constant positions can lead to overestimates of  
8 evolutionary divergence, as the lack of constant sites is explained as high divergence rather  
9 than as a deliberate data selection technique. Previous approaches to using corrections to the  
10 likelihood function in order to avoid ascertainment bias have either required knowledge of  
11 the omitted positions, or have modified the likelihood function to reflect the omitted data. In  
12 this paper we indicate that the technique used to date for this latter approach is a conditional  
13 maximum likelihood (CML) method. An alternative approach — unconditional maximum  
14 likelihood (UML) — is also possible. We investigate the performance of CML and UML  
15 and find them to have almost identical performance in the phylogenetic SNP dataset context.  
16 We also make some observations about the nucleotide frequencies observed in SNP datasets,  
17 indicating that these can differ systematically from the overall equilibrium base frequencies of  
18 the substitution process. This suggests that model parameters representing base frequencies  
19 should be estimated by maximum likelihood, and not by empirical (counting) methods.

## 20 **Introduction**

21 Leaché et al. (2015) considered likelihood methods that are available for the phylogenetic  
22 analysis of single nucleotide polymorphism (SNP) data sets, i.e. nucleotide (nt) sequence  
23 alignments in which any constant sites have been omitted. (Note that the term ‘constant site’  
24 is used to mean one in which no differences are apparent amongst the sequences collected, and  
25 not to suggest that substitution cannot ever occur there.) Starting with an equivalent situation  
26 in the analysis of restriction sites (Felsenstein, 1992), then with SNP data (Kuhner et al.,

1 2000), morphological data (Lewis, 2001) and most recently with restriction site-associated  
2 DNA sequencing (RADseq; Baird et al., 2008; Seeb et al., 2011; Peterson et al., 2012), it  
3 has been clear that omitting such sites is a form of ascertainment bias. Analyzing only variable  
4 sites, without correction, can lead to overestimation of branch lengths and biases in phylogeny  
5 inference (Lewis, 2001; Leaché et al., 2015).

6 Leaché et al. (2015) investigated three likelihood methods for correcting for the omission of  
7 constant sites. The first, developed by Felsenstein (1992) and Lewis (2001) and denoted `lewis`  
8 by Leaché et al. (2015), uses a conditional likelihood and does not explicitly consider the  
9 number of constant sites missing from the data set. The second, described by Kuhner et al.  
10 (2000) and denoted `felsenstein` by Leaché et al. (2015), uses a ‘reconstituted likelihood’  
11 requiring the total number of constant sites to be known, but does not consider their partitioning  
12 into constant-A, -C, -G or -T sites. The third method (`stamatakis`: Leaché et al., 2015)  
13 again uses reconstituted likelihood, now requiring knowledge of the exact numbers of each of  
14 the four different constant site patterns. The result of this approach is necessarily exactly the  
15 same as analyzing the original data set, with no sites omitted.

16 The `felsenstein` and `stamatakis` methods can be used in cases where data (constant  
17 sites) are omitted but the numbers of such sites are known — situations that are unlikely to  
18 arise with modern data recording techniques. Situations with unknown amounts of omitted  
19 data are more frequent, and warrant further attention. In this paper we place the `lewis` method  
20 into a more-general likelihood inferential framework and derive a new method for estimating  
21 parameters (e.g. tree topologies, branch lengths and substitution model parameters), as well as  
22 the number of omitted sites in the case that this is not known. The new method performs almost  
23 identically to the `lewis` method, and we explore the reasons for this. Lastly, we make some  
24 observations about the effect that SNP data (i.e. missing observations of constant sites) have on  
25 observed base frequencies.

## 1 **Methods**

2 Using a slightly different notation from Leaché et al. (2015) to describe the inference problem,  
3 we assume a total of  $n$  observations (SNP or non-constant sites), of which  $n_i$  correspond to  
4 pattern (possible alignment column)  $i$ ; if we observe  $l$  different patterns, then  $n = \sum_{i=1}^l n_i$ .  
5 (Sums and products are generally over  $i = 1, \dots, l$  throughout this paper; for simplicity we  
6 omit these limits when there is no ambiguity.) For a SNP data set, we do not observe the  
7 constant-A, -C, -G or -T patterns; we write the unobserved number of these as  $m$ , and the total  
8 number of sites (observed and unobserved) as  $n + m = N$ . Such data sets are described as  
9 *truncated* (Blumenthal, 1981).

10 To complete the description, we need a model describing the probabilities of occurrence of  
11 both the observed and unobserved patterns. As usual in likelihood-based phylogenetics, we  
12 will assume that an underlying tree structure with branch lengths is to be estimated, along with  
13 any free parameters of a substitution model such as JC69 (Jukes and Cantor, 1969), HKY85  
14 (Hasegawa et al., 1985) etc. Representing all the unknowns as the multidimensional parameter  
15  $\theta$ , this model defines probabilities  $p_j = p_j(\theta)$  for every possible pattern  $j$ ; it is these  $p_j$  that  
16 are usually calculated using Felsenstein's pruning algorithm (Felsenstein, 1973, 1981). Note in  
17 particular that  $p_j$  is defined for all possible  $j$ , including the unobserved constant patterns and  
18 any patterns that happen not to have occurred in a given data set. It is useful to write  $c = c(\theta)$   
19 for the total probability of occurrence of a constant site, i.e.  $c = \sum_{j \in \mathcal{C}} p_j$ , where  $\mathcal{C}$  is the set  
20 containing the four constant patterns constant-A, -C, -G and -T.

21 The truncated data likelihood function  $L_T(\theta)$  is

$$22 \quad L_T(\theta) = \prod_i p_i^{n_i} \quad (1)$$

23 Maximizing  $L_T(\theta)$  over the model parameters  $\theta$  gives their maximum likelihood (ML)  
24 estimates,  $\hat{\theta}_T$ , based on the truncated data. However, as shown by Lewis (2001) and Leaché  
25 et al. (2015), for SNP data sets the omission of the constant characters can cause serious  
26 estimation biases.

1 The problem of estimating  $\theta$  (and  $N$ ) in these circumstances was described by Sanathanan  
2 (1972). Following that paper, we consider the *complete* likelihood including the contribution  
3 of the  $m$  omitted constant sites:

$$4 \quad L(N, \theta) = \frac{N!}{(N-n)! \prod_i n_i!} c^{N-n} \left( \prod_i p_i^{n_i} \right) \quad (2)$$

5 or, equivalently,

$$6 \quad L(m, \theta) = \frac{(n+m)!}{m! \prod_i n_i!} c^m L_T(\theta) \quad (3)$$

7 Note that this retains the combinatorial component  $(n+m)!/m! \prod_i n_i!$ . In typical ML  
8 problems, where all the data are observed, the corresponding term can be omitted as it is a  
9 constant and plays no part in the maximization over  $\theta$  (Edwards, 1972) — hence its omission  
10 from eqn. 1. However, in the truncated data case this is not true: different (inferred) values of  $m$   
11 will cause the term to vary and its contribution to the likelihood cannot be ignored. Although  
12 it is unusual to infer the amount of (unobserved) data using ML, there is no reason why we  
13 should not be able to do so.

14 Notice that the likelihood can also be written as  $L(m, \theta) = L_1(m, \theta) L_2(\theta)$  where

$$15 \quad L_1(m, \theta) = \frac{(n+m)!}{n! m!} (1-c)^n c^m \quad (4)$$

16 and

$$17 \quad L_2(\theta) = \frac{n!}{\prod_i n_i!} \prod_i \left( \frac{p_i}{1-c} \right)^{n_i} = \frac{n!}{(1-c)^n \prod_i n_i!} L_T(\theta) \quad (5)$$

18  $L_1$  is the likelihood based on the probability of  $n$ , and  $L_2$  is the likelihood based on the  
19 conditional probability of the  $n_i$  given  $n$  (Sanathanan, 1972).

20 **Conditional ML:** Sanathanan (1972) describes two approaches to estimating  $m$  and  $\theta$  (see also  
21 Blumenthal, 1981). The first is the method of *conditional ML* (CML), in which the conditional  
22 likelihood  $L_2(\theta)$  (eqn. 5) is maximized over  $\theta$  to find ML model parameter estimates  $\hat{\theta}_C$ . (Note  
23 that the combinatorial term  $n!/\prod_i n_i!$  is constant and does not affect the inference.) This  
24 corresponds to precisely the method of Felsenstein (1992) and Lewis (2001), and is equivalent

1 to maximizing  $\log L_C(\theta)$  over  $\theta$ , where

$$2 \quad \log L_C(\theta) = \log L_T(\theta) + \delta_C(\theta) \quad (6)$$

3 and  $\delta_C(\theta) = -n \log(1 - c(\theta))$  is the log-likelihood ‘correction’ term that changes the truncated  
4 data set problem into the CML problem.

5 In the phylogenetics context we may only be interested in the inferred tree and associated  
6 parameters  $\hat{\theta}_C$ . If required, however, an estimate of the number of unobserved constant  
7 sites comes from maximizing  $L_1(m, \hat{\theta}_C)$  over  $m$  to find  $\hat{m}_C$ . Sanathanan (1972) shows that  
8  $\hat{m}_C = \lfloor n\hat{c}_C / (1 - \hat{c}_C) \rfloor$  where  $\hat{c}_C = c(\hat{\theta}_C)$  is the CML estimator of  $c$  and  $\lfloor \cdot \rfloor$  indicates the floor  
9 function (i.e.  $\lfloor x \rfloor$  is the greatest integer  $\leq x$ ).

10 The CML version of the SNP data set phylogeny problem is implemented in RAxML v.8  
11 (Stamatakis, 2014), invoked using the `--asc-corr=lewis` option (Leaché et al., 2015).

12 **Unconditional ML:** The second approach described by Sanathanan (1972) is *uncondi-*  
13 *tional ML* (UML), in which the full likelihood  $L(m, \theta)$  (eqn. 3) is maximized simultaneously  
14 over both  $m$  and  $\theta$ . We denote the corresponding inferred values by  $\hat{m}_U$  and  $\hat{\theta}_U$ .

15 For any fixed value  $\theta^*$ , optimization of  $L(m, \theta^*)$  over  $m$  (eqn. 3) is analogous to optimizing  
16  $L_1(m, \theta^*)$  over  $m$  (eqn. 4) and is achieved when  $\hat{m}^* = \lfloor nc^*/(1 - c^*) \rfloor$  (Sanathanan, 1972).  
17 Substituting  $m^*(\theta) = \lfloor nc(\theta)/(1 - c(\theta)) \rfloor$  into eqn. 3 and recalling that the  $n_i$  are constant  
18 means the UML problem becomes one of maximizing  $\log L_U(\theta)$  over  $\theta$ , where

$$19 \quad \log L_U(\theta) = \log L_T(\theta) + \delta_U(\theta) \quad (7)$$

20 and  $\delta_U(\theta) = \log(n + m^*(\theta))! - \log m^*(\theta)! + m^*(\theta) \log c(\theta)$  is the correction term that changes  
21 the truncated problem into the UML problem.

22 Sanathanan (1972, 1977) proves that  $\hat{m}_U < \hat{m}_C$  and  $\hat{c}_U < \hat{c}_C$ , and that the asymptotic  
23 distributions of  $(\hat{m}_C, \hat{\theta}_C)$  and  $(\hat{m}_U, \hat{\theta}_U)$  are the same. In other words, as the amount of data  
24 collected increases, the CML and UML estimators will give arbitrarily close estimates of the

1 numbers of unobserved constant sites and model parameters. However, the approaches do not  
2 necessarily lead to equally good estimates given *finite* amounts of data.

### 3 **Results and Discussion**

4 **CML and UML both perform well:** We implemented the CML and UML methods for the  
5 SNP data set phylogeny problem in order to compare their performance. We modified the  
6 `baseml` software (Yang, 2007) so that for each candidate value of  $\theta$  we first compute  $c(\theta)$   
7 and  $m^*(\theta)$  and then use these with the truncated log-likelihood function  $\log L_T(\theta)$  to compute  
8  $\log L_C(\theta)$  and  $\log L_U(\theta)$  as in eqns. 6 and 7.

9 We simulated sequence data on the 10-taxon topology studied by Leaché et al. (2015). To create  
10 a range of realistic simulation scenarios, we scaled the tree to various lengths (scaling factors  
11 of 0.25, 0.5, 1, 2 and 4, giving tree lengths of 0.08, 0.16, 0.31, 0.62 and 1.24, respectively) and  
12 used a variety of alignment sizes ( $N = 500, 1000, 2500, 5000$ ) under the JC69 model. After  
13 simulation, all constant site patterns were discarded. The probability of occurrence of constant  
14 sites ranged from 93% to 30% ( $c = 0.93, 0.86, 0.74, 0.54, 0.30$  for scaling factors 0.25, 0.5, 1,  
15 2, 4, respectively). For more extreme cases, inspired by population resequencing studies, we  
16 also considered scaling factors 0.03–0.21, giving rise to tree lengths 0.009–0.065 and  $c$  from  
17 0.99–0.94, with  $N = 100000$ .

18 Lower scale factors lead to smaller trees and thus result in fewer variable (SNP) sites on  
19 which to base inference. Our simulations cover a range, from unobserved constant sites being  
20 rare (e.g. distantly related species, or sequencing strategies such as RADseq giving strong  
21 enrichment for variable sites) to common (e.g. closely related organisms). Our most extreme  
22 scenario ( $c = 0.99$ ) resembles what might be observed with SNP data sets from population  
23 sequencing studies.

24 We used the CML and UML correction methods to re-estimate model parameters using only  
25 the variable sites from the simulated datasets, assuming knowledge of the true topology. We  
26 repeated this procedure with data simulated under the HKY85 model with moderate transition/

1 transversion rate and nucleotide bias ( $\kappa = 2$ ,  $\pi_T = 0.1$ ,  $\pi_C = 0.2$ ,  $\pi_A = 0.3$ ,  $\pi_G = 0.4$ ). In  
2 all cases, we found that estimates of branch lengths, tree length and other model parameters  
3 were almost identical with CML and UML. Figs. 1 and 2 illustrate this with a variety of results  
4 summarized from 100 simulations in each scenario; other results (not shown) all confirm these  
5 findings.

6 **Why are CML and UML almost the same?** Clearly, this is because in every case studied,  
7 the maximal values of  $\log L_C(\theta)$  and  $\log L_U(\theta)$  are attained at very similar values of  $\theta$ . As  
8 these likelihoods differ only in the terms  $\delta_C(\theta)$  and  $\delta_U(\theta)$ , we would like to study how these  
9 vary with  $\theta$ . However, as this represents a complex multidimensional parameter (Yang et al.,  
10 1995), it is difficult to visualize likelihoods as  $\theta$  varies over candidate solutions. To simplify  
11 our investigation, we give an illustration using a single JC69 simulation with the 10-taxon tree  
12 of Leaché et al. (2015) with scaling factor 1 and  $N = 1000$  alignment sites simulated before  
13 removal of constant patterns. For these data, we found the truncated likelihood-optimal branch  
14 lengths  $\hat{\theta}_T$  and the CML-optimal branch lengths  $\hat{\theta}_C$ , and focus attention on values of  $\theta$  formed  
15 by interpolating between  $\hat{\theta}_T$  and  $\hat{\theta}_C$  and extrapolating this range beyond  $\hat{\theta}_T$  and  $\hat{\theta}_C$ . This gives  
16 a one-dimensional subspace which includes both  $\hat{\theta}_T$  and  $\hat{\theta}_C$ . Fig. 3 shows values of  $\log L_T(\theta)$   
17 (eqn. 1),  $\log L_C(\theta)$ ,  $\delta_C(\theta)$  (eqn. 6),  $\log L_U(\theta)$  and  $\delta_U(\theta)$  (eqn. 7) for these values of  $\theta$ , with the  
18  $x$ -axis simultaneously labelled by the corresponding values of  $c(\theta)$  and  $m^*(\theta)$ .

19 Firstly, note the truncated likelihood (indicated by the solid black line) is maximized at a value  
20 of  $\theta$  suggesting far too few omitted constant sites ( $c(\hat{\theta}_T) = 0.3$  and  $m^*(\hat{\theta}_T) = 100$ , whereas the  
21 true values of  $c$  and  $m^*$  for this simulation are 0.743 and 743, respectively). This corresponds to  
22 a tree that is too divergent. The correction terms  $\delta_C(\theta)$  and  $\delta_U(\theta)$  (dashed blue and orange lines,  
23 respectively), while very different in absolute value, have very similar gradients. Consequently,  
24 when they are added to  $\log L_T(\theta)$  to form  $\log L_C(\theta)$  and  $\log L_U(\theta)$  (solid blue and orange lines,  
25 respectively), these likelihoods have maxima at very similar values of  $\theta$  (with  $c(\hat{\theta}_C)$  and  $c(\hat{\theta}_U)$   
26 equal to 0.69, and  $m(\hat{\theta}_C)$  and  $m(\hat{\theta}_U) \approx 570$ ). In brief, the effects of the corrections  $\delta_C(\theta)$  and  
27  $\delta_U(\theta)$  in the optimization of  $\log L_C(\theta)$  and  $\log L_U(\theta)$  are indeed very similar.

28 It is not the absolute values of  $\delta_C$  and  $\delta_U$  that are critical to the difference between  $\hat{\theta}_C$  and



1  $\hat{\theta}_U$ , but how they vary in the regions of the CML and UML optima. Further analysis might  
2 consider the derivatives of  $\delta_C$  and  $\delta_U$  with respect to  $\theta$ , but in the SNP phylogeny question this  
3 is complicated by the non-standard form of the topology parameter  $\theta$  (Yang et al., 1995) and  
4 by the factorial and floor functions in  $\delta_U$ . However,  $\delta_C$  and  $\delta_U$  only depend on  $\theta$  through the  
5 probability of constant patterns  $c(\theta)$  and so an alternative approach is to consider the relative  
6 variation of  $\delta_C$  and  $\delta_U$  as  $c$  varies. In particular, if  $\delta_C(c_1) - \delta_C(c_0)$  and  $\delta_U(c_1) - \delta_U(c_0)$  are very  
7 similar for any  $c_0 \approx c_1$  (and in particular near to  $c(\hat{\theta}_C)$  and  $c(\hat{\theta}_U)$ ), then the CML and UML  
8 correction terms will have similar effects on the optimizations of  $\log L_C$  and  $\log L_U$ , leading to  
9 similar CML and UML estimates.

10 Indeed, it can be shown (omitted for brevity) that if  $c_0$  and  $c_1$  are chosen to be similar, such that  
11 the corresponding values  $m_0^*$  and  $m_1^*$  satisfy  $m_1^* = m_0^* + 1$ , then

$$12 \quad [\delta_C(c_1) - \delta_C(c_0)] - [\delta_U(c_1) - \delta_U(c_0)] \approx \frac{(1 - c_0)^2}{2nc_0} \quad (8)$$

13 This represents a measure of the difference between the gradients  $d\delta_C/dm$  and  $d\delta_U/dm$   
14 (Fig. 3); since it scales as  $1/n$ ,  $\delta_C(\theta)$  and  $\delta_U(\theta)$  will be expected to have very similar effects  
15 for reasonably large values of  $n$ , which will be the case for most phylogenetic problems.

16 **Base frequencies can behave unexpectedly in SNP datasets:** While analyzing simulated  
17 datasets as described above, we noticed the observed frequencies of nucleotides A, C, G and T  
18 in the HKY simulations did not always match the corresponding model parameters. We realized  
19 this is because in those models where different nucleotides have different substitution rates,  
20 the constant-A, -C, -G and -T site patterns have different probabilities of occurrence. As a  
21 consequence, the observed frequencies of A, C, G and T amongst the constant site patterns  
22 omitted from SNP datasets, and amongst the SNP patterns retained for analysis, will differ from  
23 the model parameter values. This is illustrated in Fig. 4, using the HKY simulation scenario  
24 described above.

25 As a consequence, it may be advisable to estimate base frequencies using ML rather than the  
26 simple counting (empirical) method when working with SNP data (Goldman, 1993). We have

1 used this approach throughout this paper.

## 2 **Conclusions**

3 In all of our analyses of simulated data using the CML and UML approaches for removing  
4 ascertainment bias from SNP datasets, we have found virtually no difference in the results  
5 obtained. We explain this by observing that the different approaches' respective correction  
6 terms  $\delta_C$  and  $\delta_U$  behave very similarly in their effects (Fig. 3). This has further been supported  
7 by our analysis of the gradients of  $\delta_C$  and  $\delta_U$ , which confirms their similarity for plausible  
8 phylogenetic scenarios and data quantities. Although we have not investigated tree topology  
9 estimation, the near-identical results of CML and UML for estimation of other parameters,  
10 including branch lengths, lead us to think it very unlikely that they could behave differently  
11 for topology estimation. We therefore conclude that it is of little importance which of these  
12 methods is used in practice in phylogenetic studies. The CML method is widely available via  
13 the `--asc-corr=lewis` option of RAxML (Stamatakis, 2014; Leaché et al., 2015).

14 We note in passing that the observed base frequencies in SNP datasets can differ systematically  
15 from the corresponding substitution model parameters, due to bias in the frequency with which  
16 constant-nucleotide site patterns arise and are thus omitted. A simple solution to this should be  
17 to use ML to estimate these parameters (Goldman, 1993).

## 18 **Acknowledgments**

19 We thank Joe Felsenstein and Alexis Stamatakis for discussions of an earlier (incorrect) attempt  
20 at this study, Jakub Truszkowski for helpful discussions of that attempt and then the CML and  
21 UML methods, and Melissa Ward for alerting us to issues of base frequency estimation with  
22 SNP datasets.

## 1 **References**

- 2 Baird, N. A., P. D. Etter, T. S. Atwood, M. C. Currey, A. L. Shiver, Z. A. Lewis, E. U. Selker,  
3 W. A. Cresko, and E. A. Johnson. 2008. Rapid SNP discovery and genetic mapping using  
4 sequenced RAD markers. *PLoS ONE* 3:e3376.
- 5 Blumenthal, S. 1981. A Survey of Estimating Distributional Parameters and Sample Sizes from  
6 Truncated Samples Pages 75–86. Springer Netherlands, Dordrecht.
- 7 Edwards, A. W. F. 1972. *Likelihood*. Cambridge University Press, Cambridge.
- 8 Felsenstein, J. 1973. Maximum likelihood and minimum-steps methods for estimating  
9 evolutionary trees from data on discrete characters. *Systematic Biology* 22:240–249.
- 10 Felsenstein, J. 1981. Evolutionary trees from DNA sequences: a maximum likelihood  
11 approach. *Journal of Molecular Evolution* 17:368–376.
- 12 Felsenstein, J. 1992. Phylogenies from restriction sites: a maximum-likelihood approach.  
13 *Evolution* 46:159–173.
- 14 Goldman, N. 1993. Statistical tests of models of dna substitution. *Journal of Molecular*  
15 *Evolution* 36:182–198.
- 16 Hasegawa, M., H. Kishino, and T. Yano. 1985. Dating of the human-ape splitting by a molecular  
17 clock of mitochondrial DNA. *Journal of Molecular Evolution* 22:160–174.
- 18 Jukes, T. H. and C. R. Cantor. 1969. Evolution of Protein Molecules. Pages 21–132 *in*  
19 *Mammalian Protein Metabolism* (H. N. Munro, ed.). Academic Press, New York.
- 20 Kuhner, M. K., P. Beerli, J. Yamato, and J. Felsenstein. 2000. Usefulness of single nucleotide  
21 polymorphism data for estimating population parameters. *Genetics* 156:439–447.
- 22 Leaché, A. D., B. L. Banbury, J. Felsenstein, A. Nieto-Montes de Oca, and A. Stamatakis. 2015.  
23 Short tree, long tree, right tree, wrong tree: new acquisition bias corrections for inferring  
24 SNP phylogenies. *Systematic Biology* 64:1032–1047.

- 1 Lewis, P. O. 2001. A likelihood approach to estimating phylogeny from discrete morphological  
2 character data. *Systematic Biology* 50:913–925.
- 3 Peterson, B. K., J. N. Weber, E. H. Kay, H. S. Fisher, and H. E. Hoekstra. 2012. Double digest  
4 RADseq: an inexpensive method for *de novo* SNP discovery and genotyping in model and  
5 non-model species. *PLoS ONE* 7:e37135.
- 6 Sanathanan, L. 1972. Estimating the size of a multinomial population. *Annals of Mathematical*  
7 *Statistics* 43:142–152.
- 8 Sanathanan, L. 1977. Estimating the size of a truncated sample. *Journal of the American*  
9 *Statistical Association* 72:669–672.
- 10 Seeb, J. E., G. Carvalho, L. Hauser, K. Naish, S. Roberts, and L. W. Seeb. 2011. Single-  
11 nucleotide polymorphism (SNP) discovery and applications of SNP genotyping in nonmodel  
12 organisms. *Molecular Ecology Resources* 11 (Suppl. 1):1–8.
- 13 Stamatakis, A. 2014. RAxML version 8: a tool for phylogenetic analysis and post-analysis of  
14 large phylogenies. *Bioinformatics* 30:1312–1313.
- 15 Yang, Z. 2007. PAML 4: phylogenetic analysis by maximum likelihood. *Molecular Biology*  
16 *and Evolution* 24:1586–1591.
- 17 Yang, Z., N. Goldman, and A. Friday. 1995. Maximum likelihood trees from dna sequences: A  
18 peculiar statistical estimation problem. *Systematic Biology* 44:384–399.

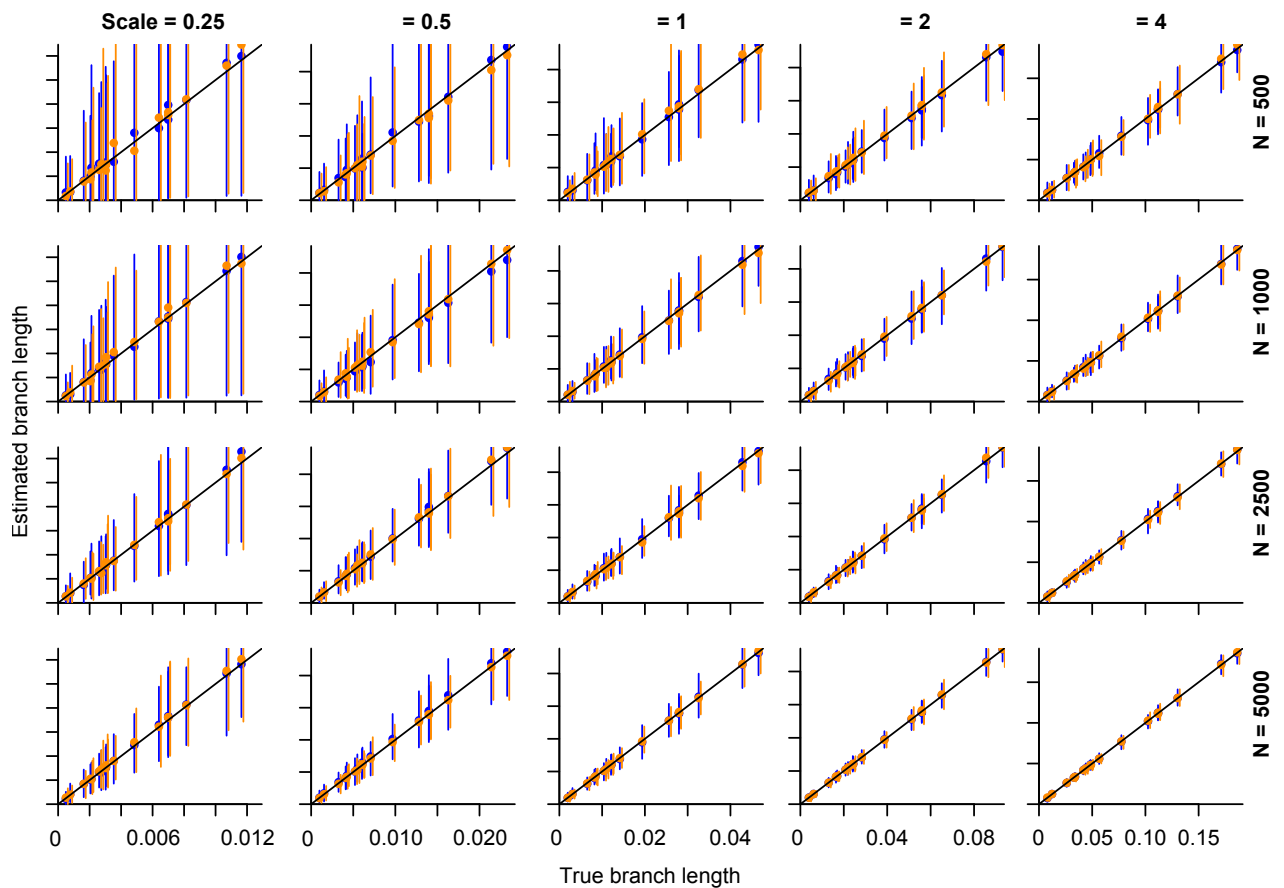

Figure 1: Branch length estimates under various JC69 simulation scenarios. Within each row, scenarios have the same number of sites simulated ( $N$ , i.e. before constant sites were removed); within columns, the same tree length scaling factor. Graphs show the mean and 5–95%-ile range for each of the 17 branch length estimates plotted against the true value, derived from 100 simulations. CML results are shown in blue; UML in orange. The two methods' results are essentially indistinguishable.

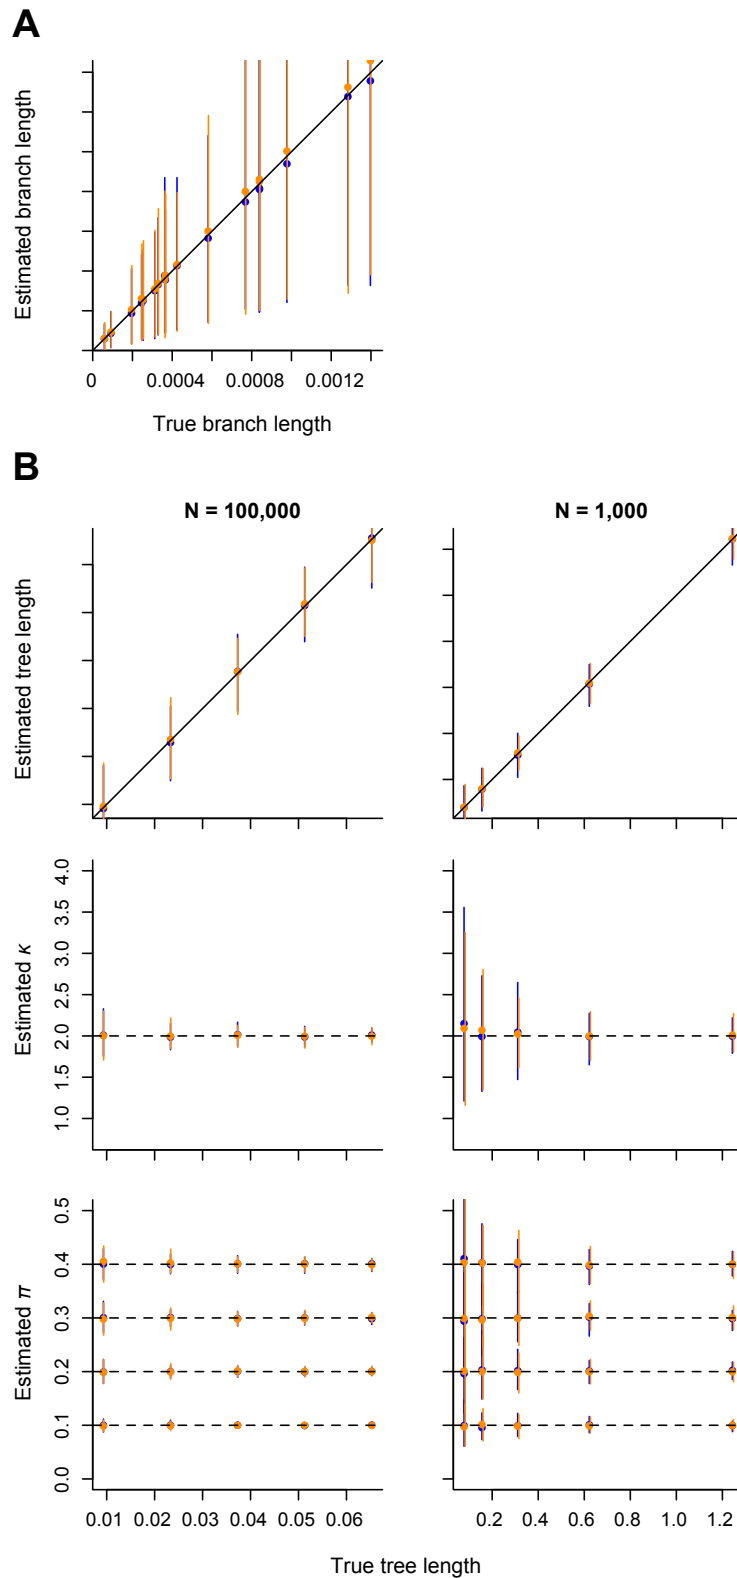

Figure 2: Parameter estimates (means and 5–95%-ile ranges from 100 simulations in each case) under various simulation scenarios. **A**: Branch length estimates from JC69 simulations with scaling factor 0.03 (tree length 0.09;  $c = 0.99$ ) and  $N = 100000$ . **B**: Parameter estimates from HKY85 simulations. Left column:  $N = 100000$ ,  $c$  from 0.99–0.94; right column:  $N = 1000$ ,  $c$  from 0.93–0.30. Graphs show estimates of overall tree length (top),  $\kappa$  (middle) and nucleotide frequencies (bottom) for various tree length scaling scenarios. Colours etc. as for Fig. 1. Again, CML and UML give essentially the same results.

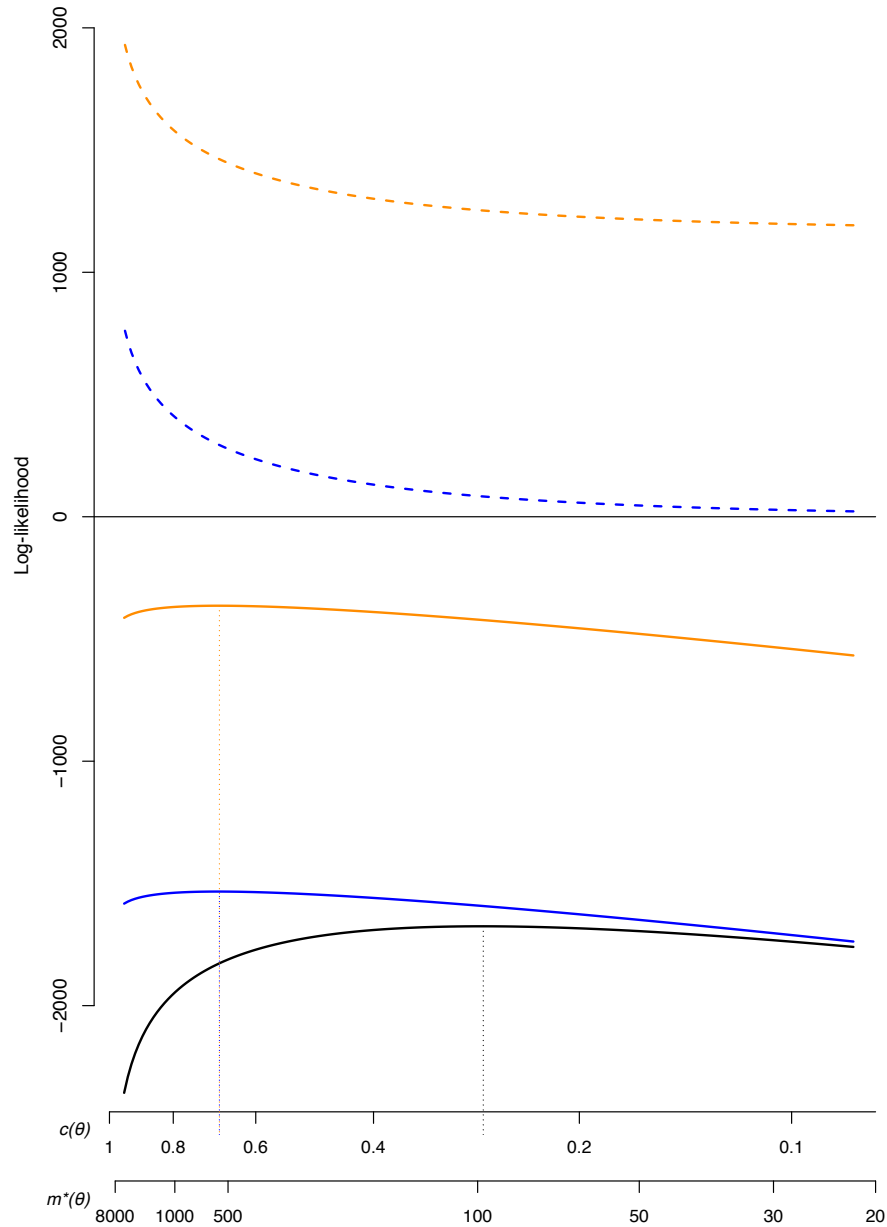

Figure 3: Likelihoods and correction terms in a single simulation case. From bottom to top, plots show  $L_T(\theta)$  (solid black line),  $L_C(\theta)$  (solid blue),  $L_U(\theta)$  (solid orange),  $\delta_C(\theta)$  (dashed blue) and  $\delta_U(\theta)$  (dashed orange). The  $x$ -axis is labelled with the values of  $c(\theta)$  and  $m^*(\theta)$  corresponding to the range of branch length parameters  $\theta$  described in the text. Locations of  $\hat{\theta}_T$ ,  $\hat{\theta}_C$  and  $\hat{\theta}_U$  are indicated by vertical dotted lines.

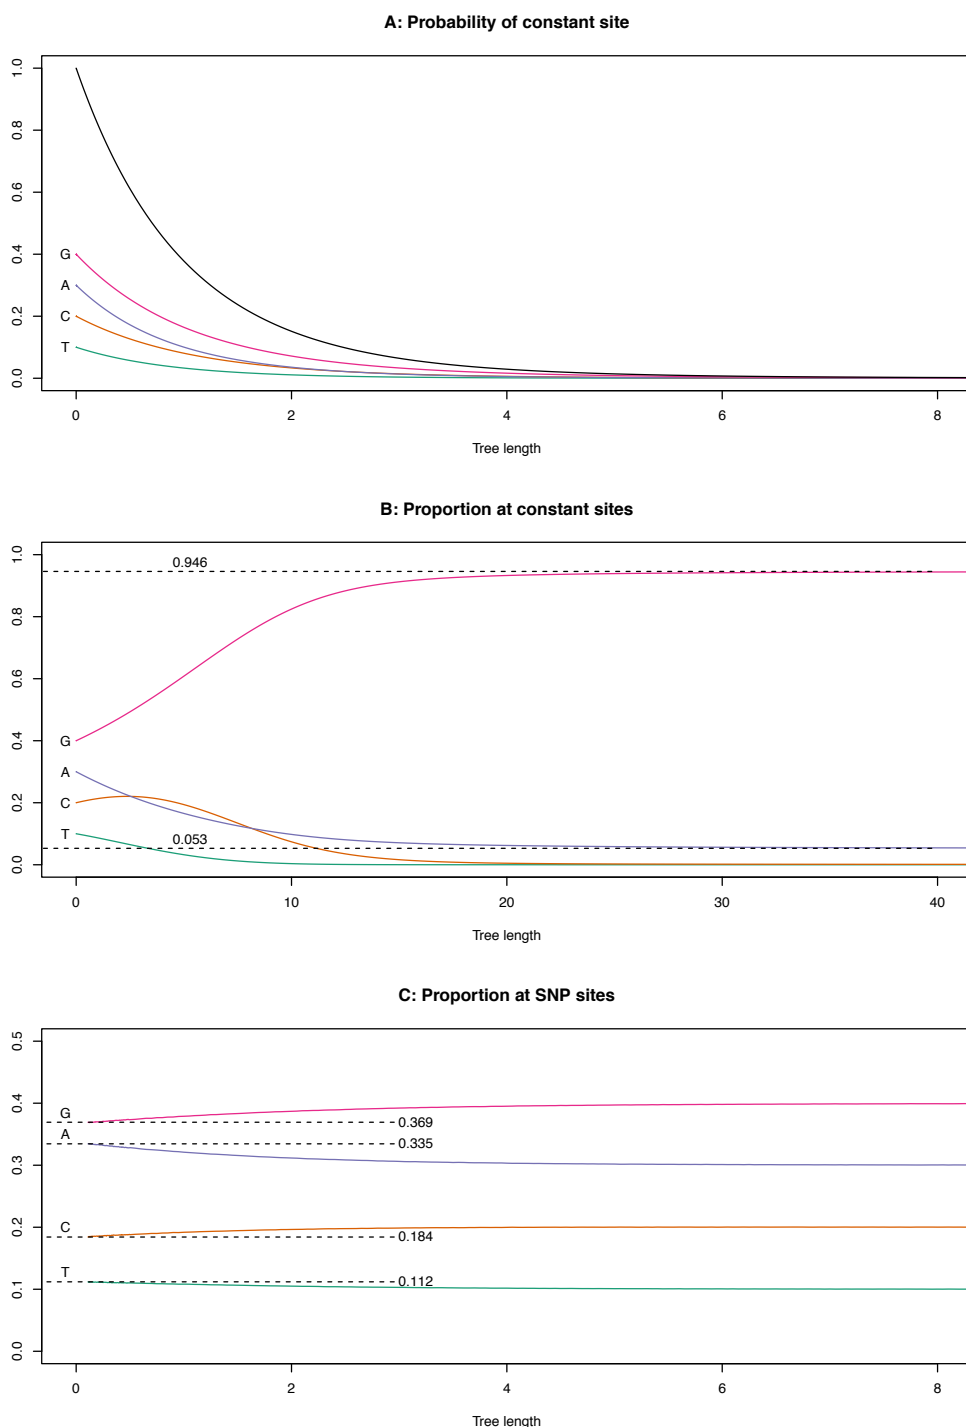

Figure 4: Base frequencies observed with SNP datasets. **A:** As the 10-taxon tree used throughout this study is scaled from a length of 0 to increasingly large branch lengths, the proportion of constant sites (top, black) falls to 0; the component proportions of constant-A, -C, -G and -T patterns falls from their equilibrium values to 0. **B:** Conditional on observing a constant pattern, the proportions of nucleotides A, C, G and T vary as the tree size increases. (Note that these proportions need not vary monotonically, as observed for the constant-C patterns in this example.) **C:** Conditional on observing a non-constant (SNP) pattern, the observed base frequencies also differ from the model parameters for shorter tree lengths.
